# Supplementary material for: α-2-Macroglobulin in Saliva Is Associated with Glycemic Control in Patients with Type 2 Diabetes Mellitus
Source: Hindawi journal article supplement (doi:10.1155/2015/128653), 2015-01-01

## Supporting Information

**Figure S1** Scatter diagram showing the association between total protein concentration and A2MG concentration in saliva based on Pearson's correlation analysis.

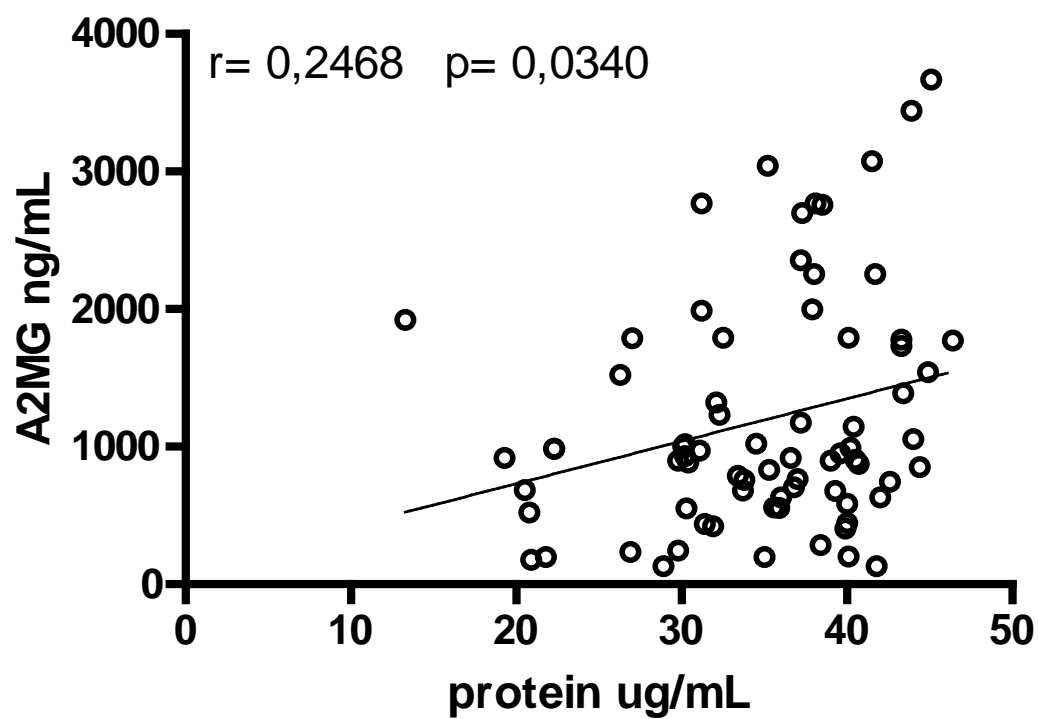

**Figure S2** Bar graph showing the comparison of saliva levels of A2MG from whole saliva, parotid saliva and sublingual saliva between patients with adequate and inadequate glycemic control. Data represent a n=50; bars indicate SEM; \*\* p < 0.01. \*\*\* p < 0.001 indicates differences between patients with HbA1c percentage <7% and > 7%.

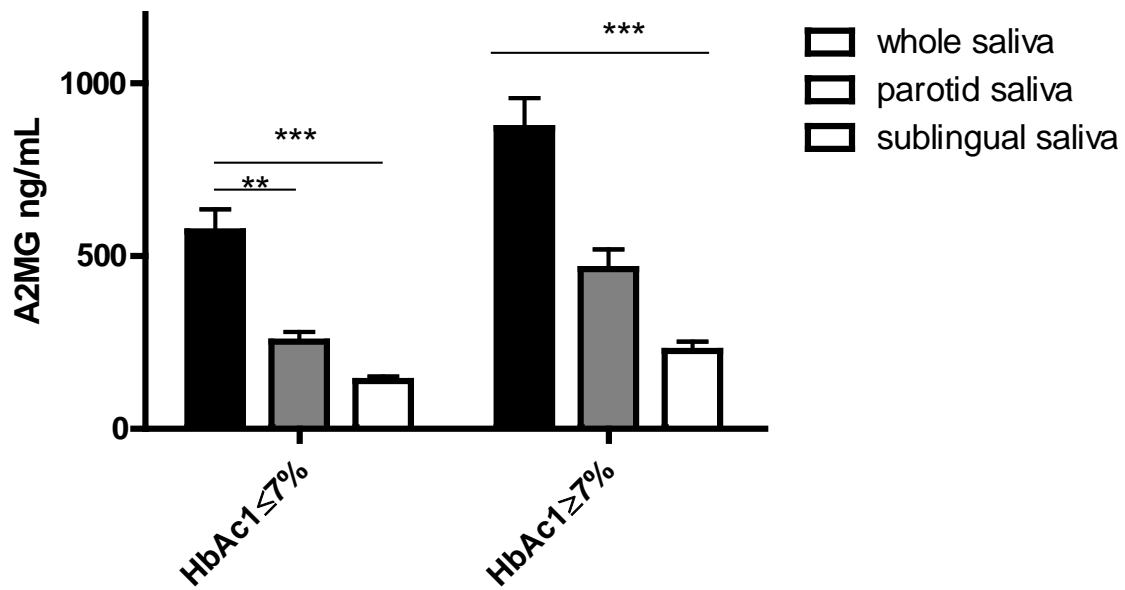

Supplement: f1 [file 128653.f1.pdf]
